# Supplementary material for: Patient induced pluripotent stem cell-derived hepatostellate organoids establish a basis for liver pathologies in telomeropathies
Source: bioRxiv or medRxiv preprint supplement (doi:10.1101/2021.11.19.469258), 2021-11-19

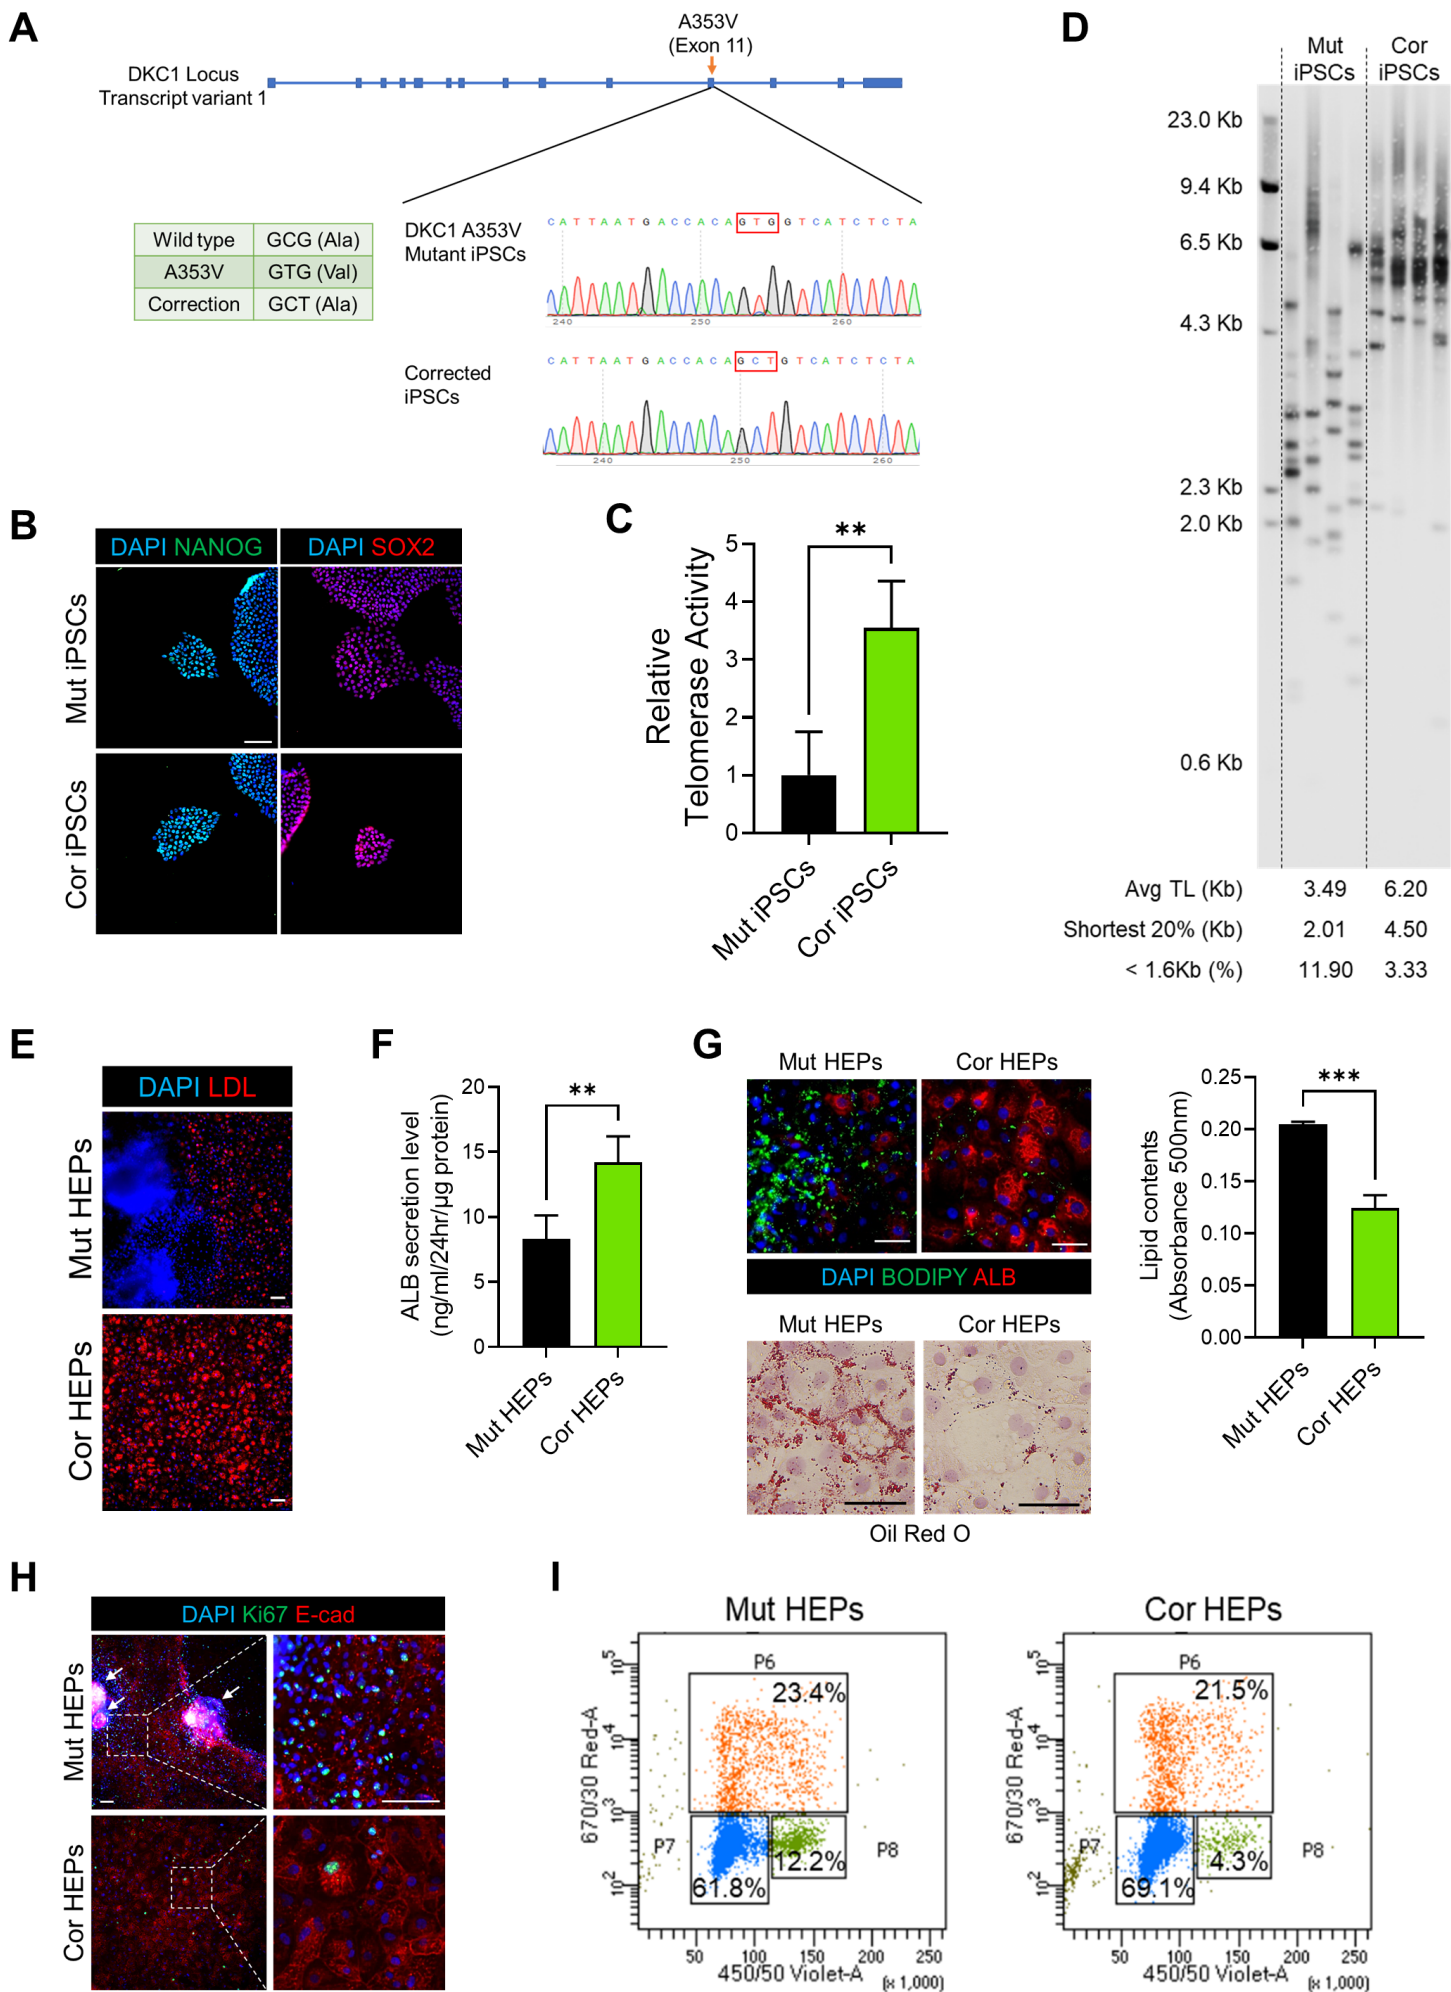

**A**

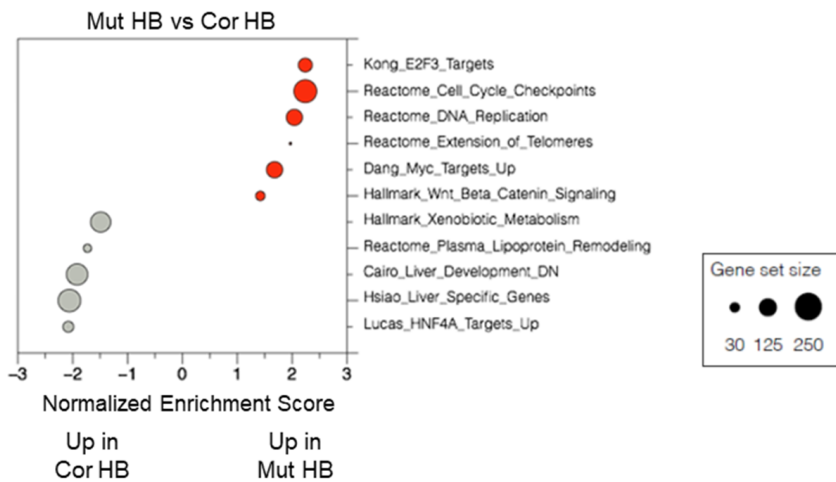

**B**

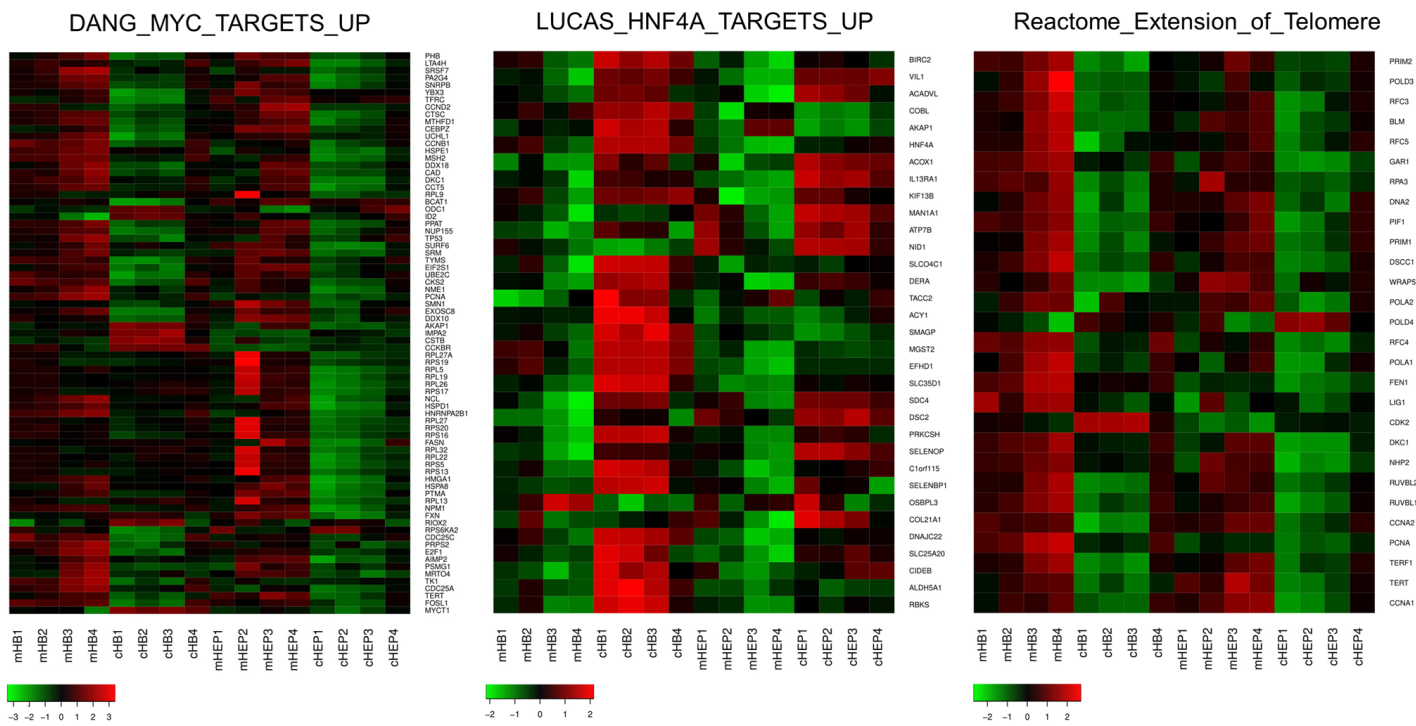

**C**

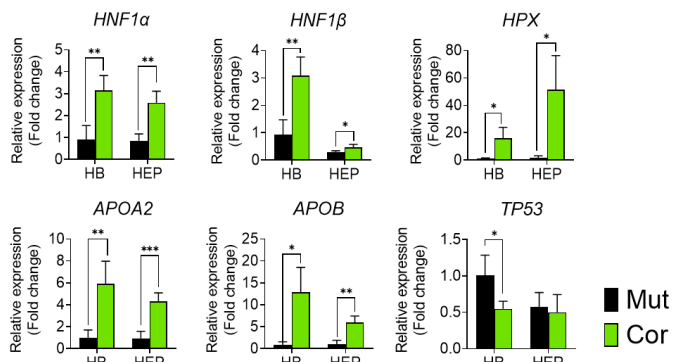

**D**

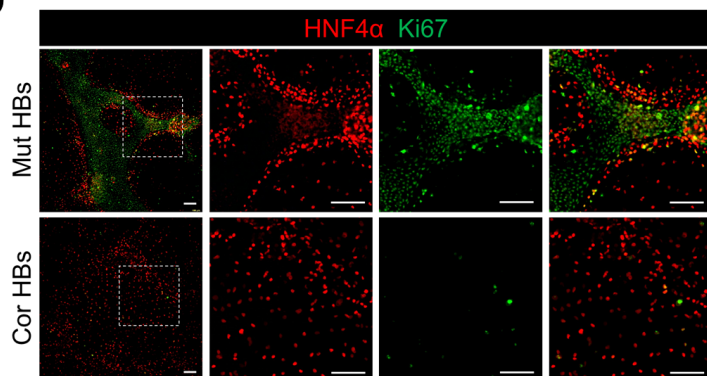

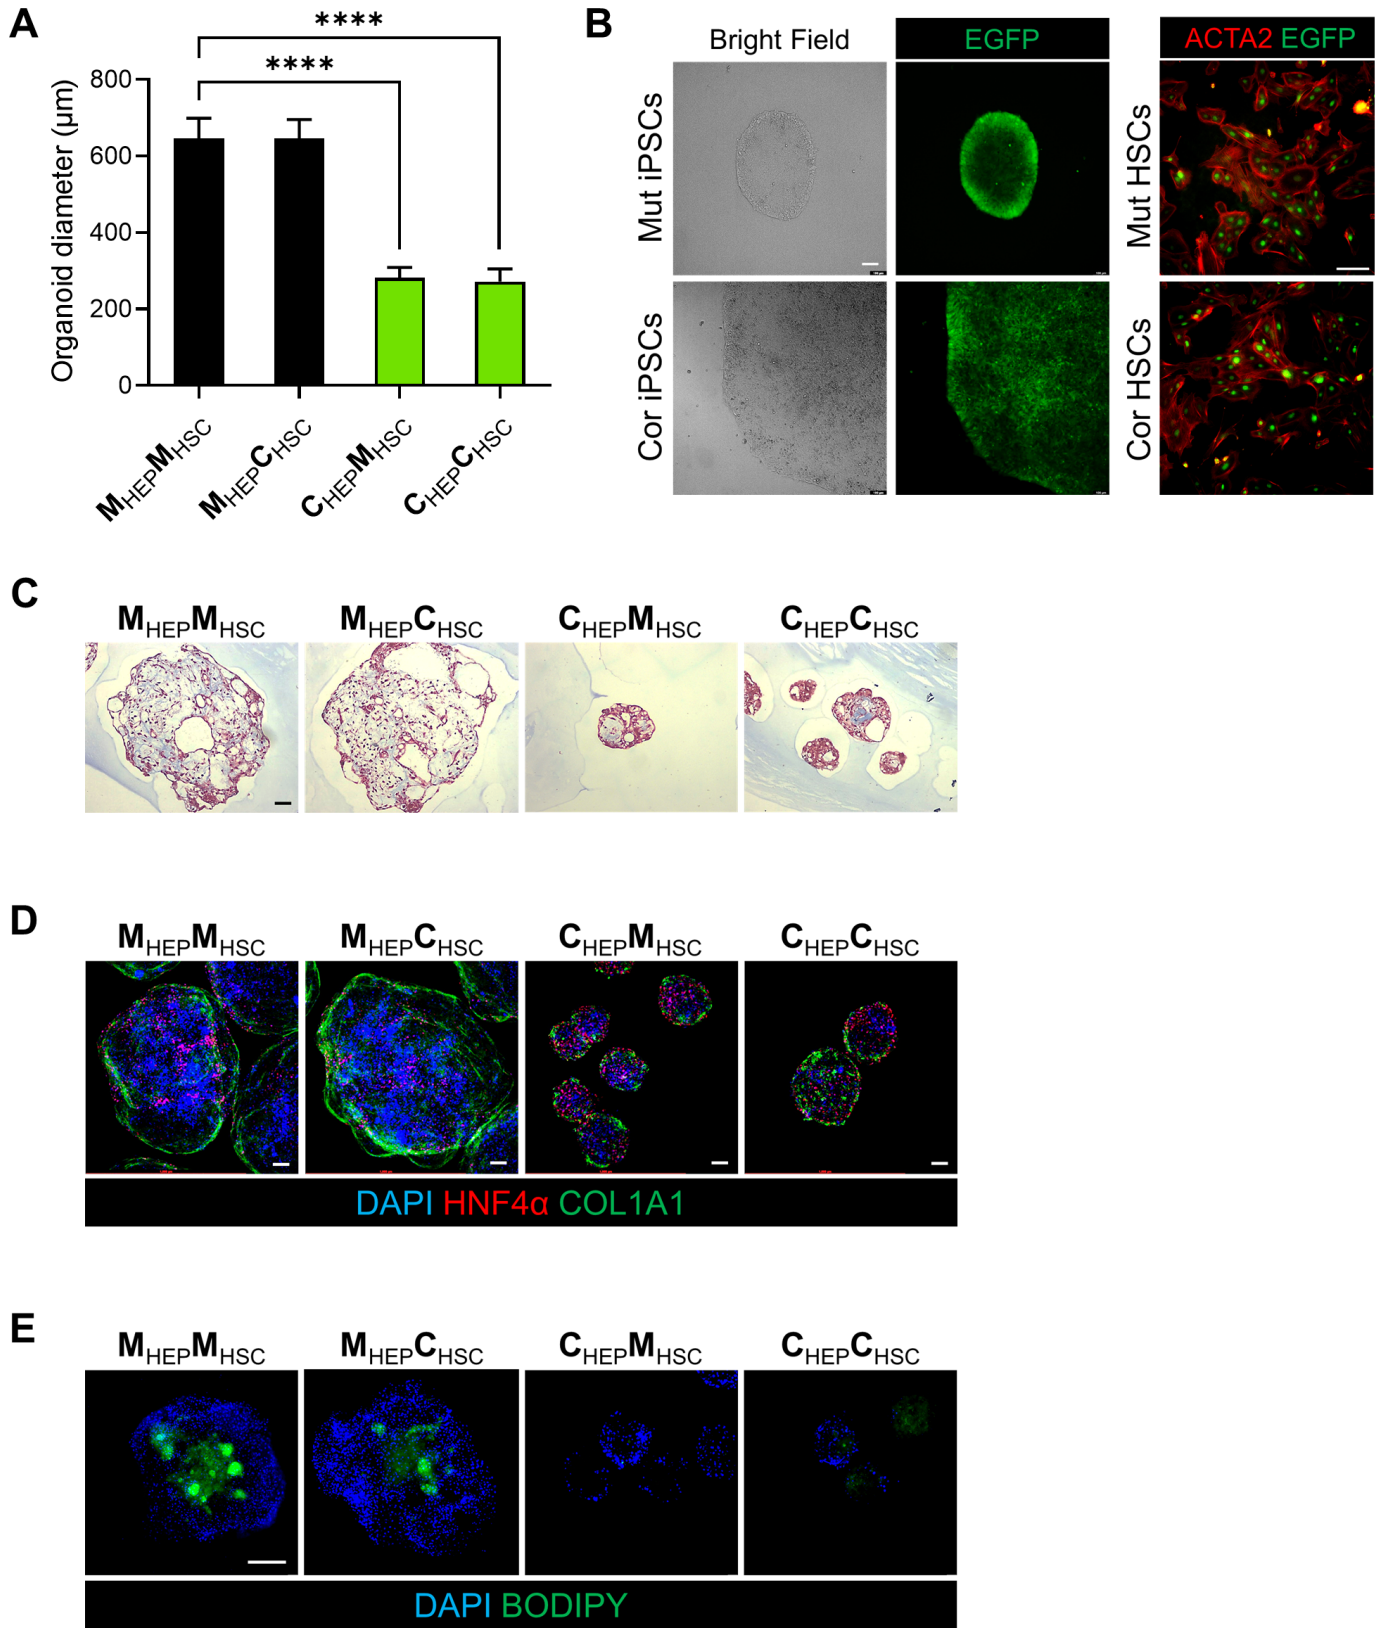

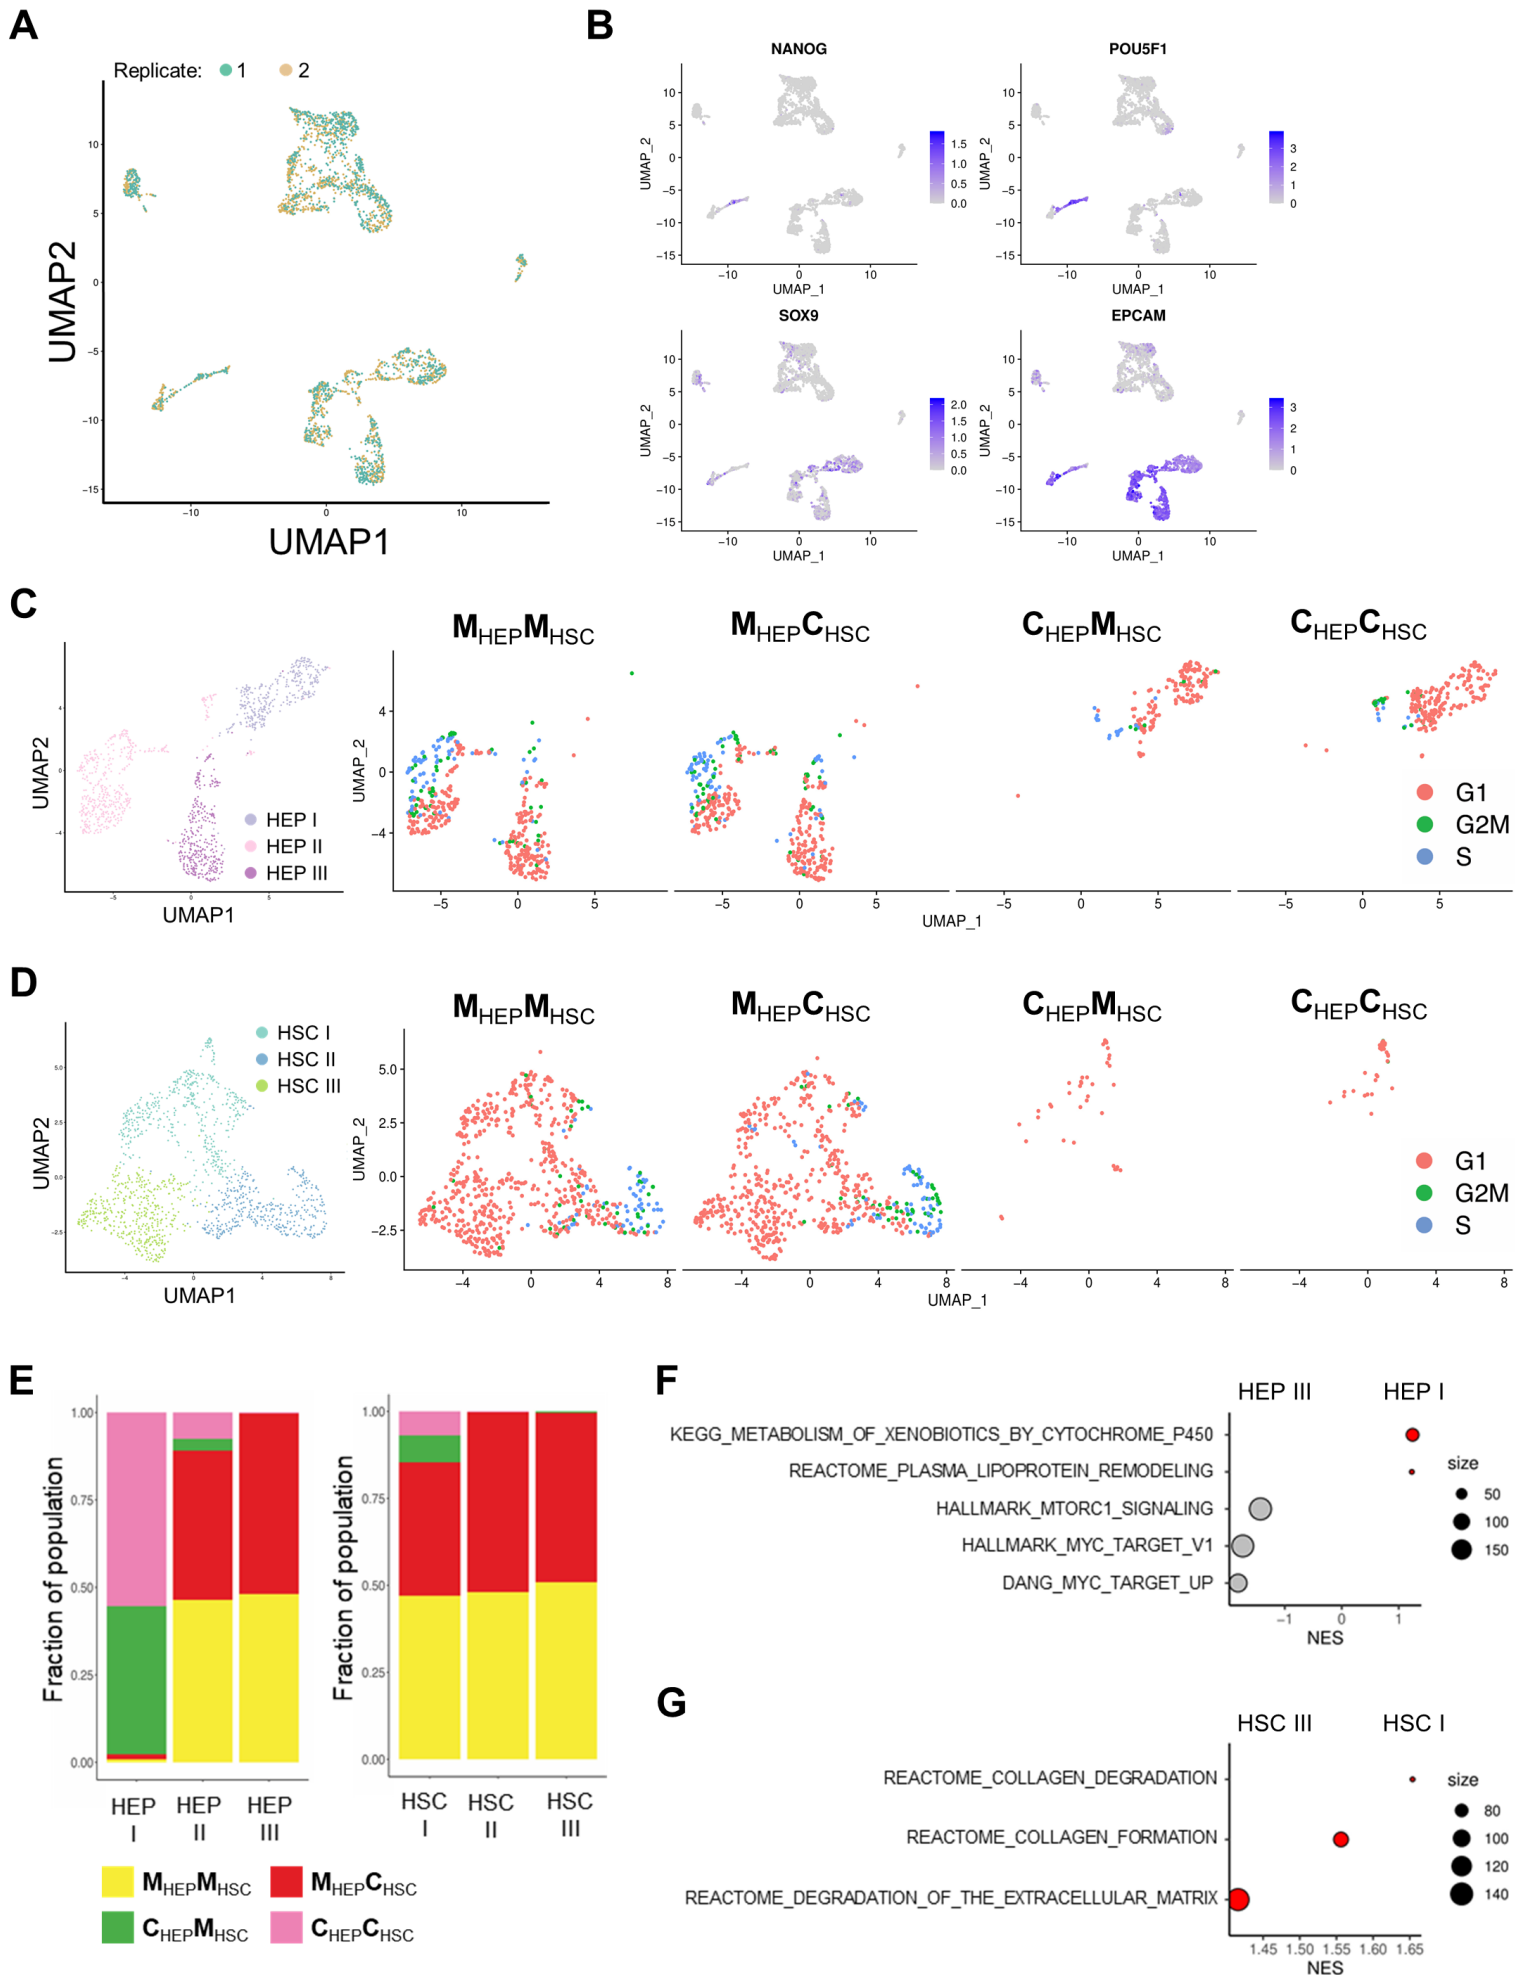

**A**

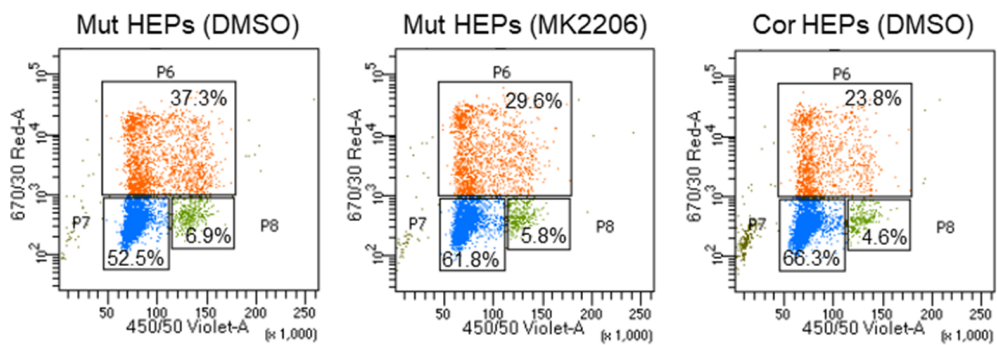

**B**

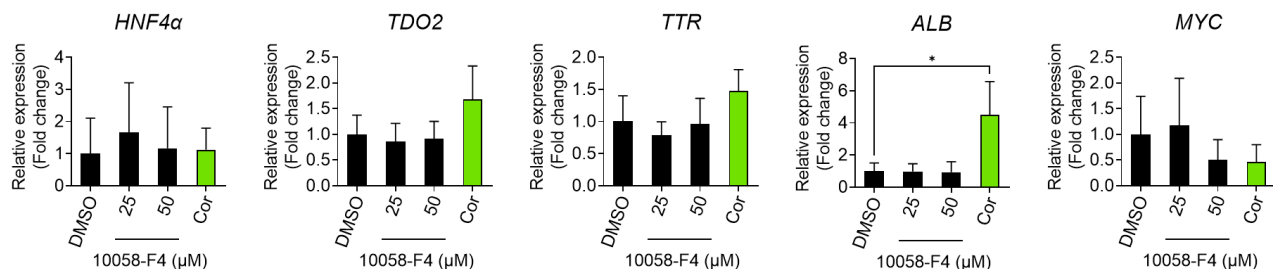

**C**

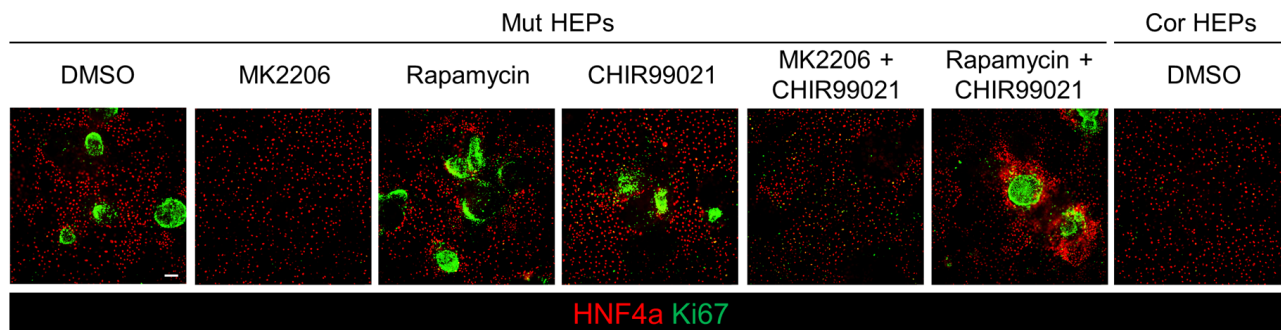

**D**

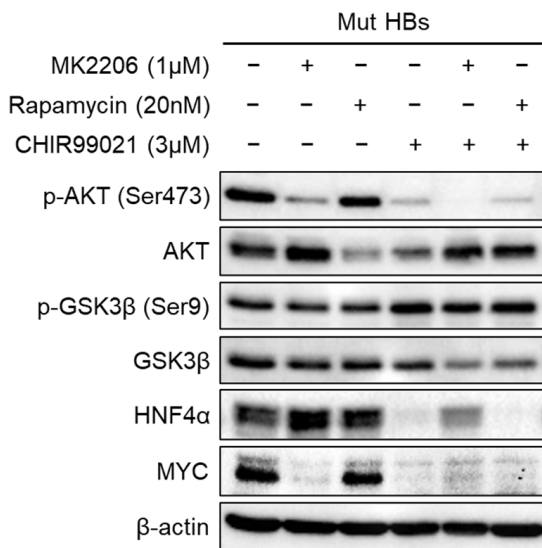

**E**

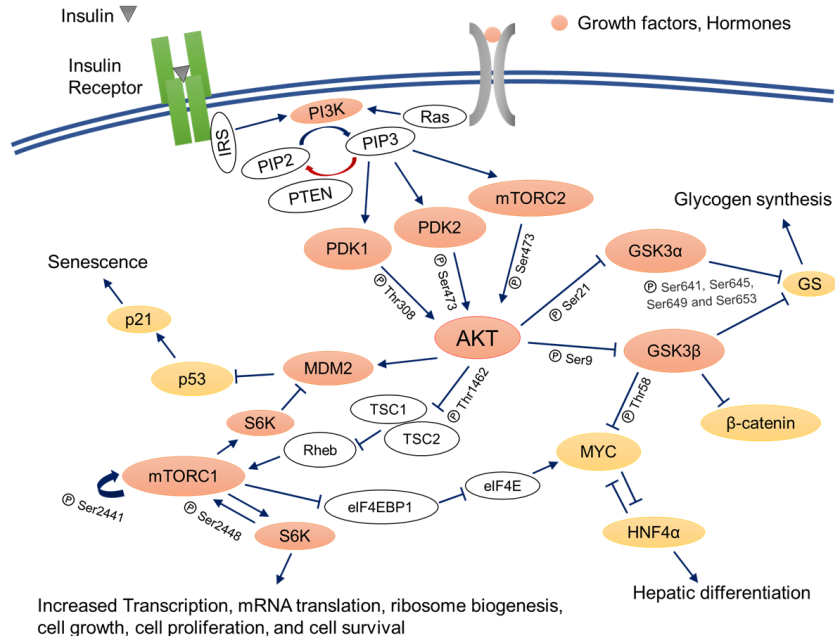

**A**

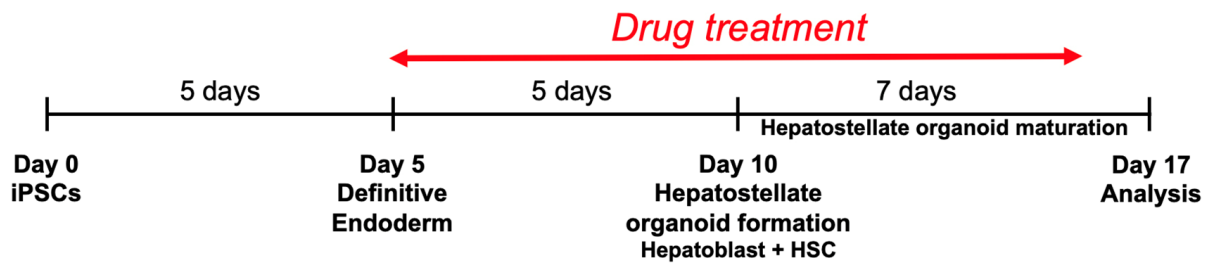

**B**

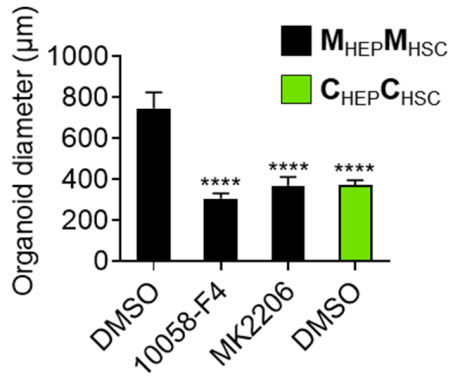

**C**

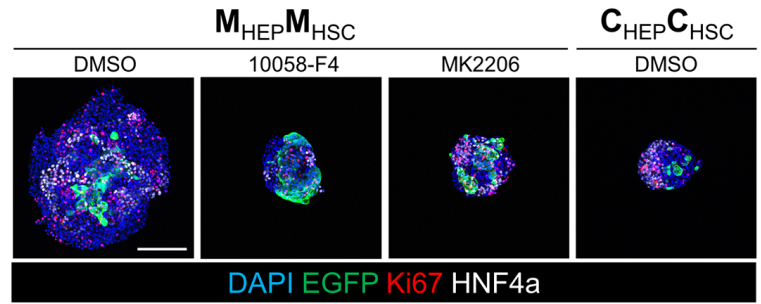

**D**

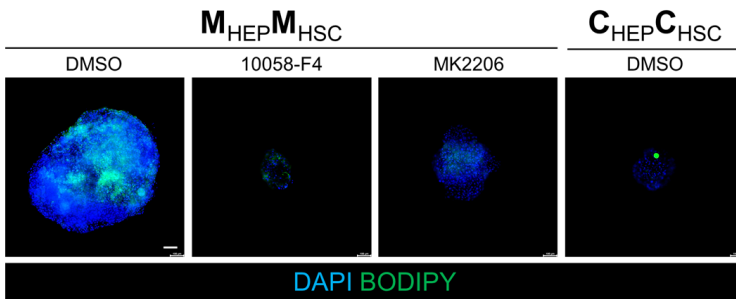

**E**

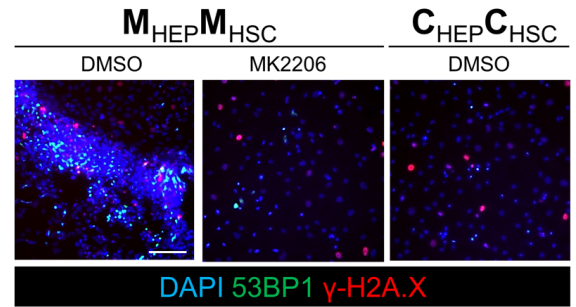

Supplement: Supplementary file [file media-2.pdf]
